# Supplementary material for: Effects of pH, temperature and hydraulic disturbance on nitrogen release from sediments in the Sunxi River, Three Gorges Reservoir Area, China
Source: PeerJ. 2025 Mar 26;13:e19161. doi: 10.7717/peerj.19161 (PMC11954460; doi:10.7717/peerj.19161)
Supplement: Supplemental Information 1 [file peerj-13-19161-s001.xlsx]

## Sheet: sediment
sample	pH	EC（us/cm）	TN(g/kg)	TP(g/kg)	AP（mg/kg)	SOM（g/kg)	AK（mg/kg)
1	6.65	64.8	2.12731	0.14	16.07	46.3075	103.588
2	6.78	48	1.26185	0.194947	14.6091	29.8907	72.5113
5	7.5	66.3	0.169905	0.174113	14.6091	5.83276	62.1526
6	7.63	56.5	0.117485	0.136909	16.5569	3.03162	51.7938
7	7.59	70.4	0.215398	0.247032	16.5569	5.69093	51.7938
8	7.67	64.3	0.100973	0.177089	9.4959	3.56348	51.7938
9	5.2	50.1	0.0502268	0.107146	6.81757	1.31193	31.0763
10	6.76	53.5	0.0513237	0.123516	11.4438	1.48922	41.4351
11	6.83	52.1	0.0431258	0.138397	11.9307	1.52467	41.4351
15	6.75	59.8	0.0437031	0.12798	9.25241	0.726879	41.4351
16	6.68	52.3	0.19727	0.123516	14.8526	9.71536	41.4351
20	6.72	34.6	0.0824412	0.163696	13.1482	3.84714	31.0763
21	6.6	41.8	0.131918	0.125004	11.6873	7.21561	31.0763
22	6.65	61.6	0.266837	0.178577	9.00893	8.74028	51.7938
23	6.51	106.4	0.826548	0.345249	27.7572	26.3627	103.588
24	6.47	64.2	0.509946	0.285724	19.4788	12.1442	82.8701
25	6.4	57.8	0.519184	0.200899	12.4177	32.2132	51.7938
26	6.67	83.9	0.457812	0.241079	9.25241	9.80401	62.1526
27	6.69	84.8	0.585386	0.239591	18.0179	11.2755	72.5113
29	6.75	95.1	0.438654	0.206852	20.6962	12.0024	62.1526
30	6.9	46.8	0.098351	0.153279	14.8526	4.32582	41.4351
31	6.71	57.7	0.990375	0.327392	15.583	16.5764	72.5113
32	6.72	122.8	0.545975	0.269354	23.131	14.9453	93.2289
34	6.89	51.8	0.436813	0.306558	23.131	17.4274	82.8701
35	6.67	63.4	0.791877	0.284236	18.0179	15.5127	72.5113
36	6.77	68.6	0.245289	0.211316	16.8004	4.91087	93.2289
38	6.62	42.9	0.276053	0.209828	10.7133	7.12696	51.7938
40	6.6	102.7	0.615882	0.340785	15.583	1.50694	62.1526
41	6.5	71.4	0.300816	0.199411	24.8354	1.64877	72.5113
43	6.52	140.9	1.33785	0.482159	56.7319	9.50262	134.664
45	6.91	36.5	0.0992439	0.111611	7.79151	4.50311	31.0763
46	6.56	34.5	0.284836	0.133933	12.1742	0.780066	41.4351
47	6.81	42.8	0.127882	0.105658	13.1482	5.35409	51.7938
51	6.63	78.3	0.113359	0.130957	7.54802	4.69812	41.4351
									EC: sediment electrical conductivity; SOM: sediment organic matter; TN: sediment total nitrogen; TP: sediment total phosphorus; AP: sediment available phosphorus; AK: sediment readily available potassium

## Sheet: water
	sample	Latitude	Longitude	T（℃）	pH	EC（us/cm）	DO（mg/L）	COD（mg/L）	TN（mg/L）	TP(mg/L)	NN(mg/L)	DP(mg/L)
upper reach	1	28°37′50.53″	106°25′2.42″	24	10	82.9	7	1.51	1.119	0.065246	0.717	0.0243464
	2	28°38′41.00″	106°24′27.68″	23.8	9.5	122.5	6.7	1.51	1.138	0.017271	0.665	0.0074912
	3	28°39′48.56″	106°24′2.68″	22.3	9.2	270	7.1	6.02	2.428	0.071003	1.363	0.0486928
	4	28°40′36.11″	106°23′52.35″	22.5	9.3	242	6	1.51	1.633	0.047975	1.3135	0.0299648
	5	28°41′3.96″	106°23′37.42″	22.4	9.2	247	8.3	1.51	1.52	0.047975	1.0415	0.018728
	6	28°41′44.33″	106°23′34.04″	23.5	8.9	248	6.9	1.51	0.94	0.03838	0.537	0.0262192
	7	28°42′11.46″	106°23′26.52″	23.5	9.1	219	7.2	1.51	1.49	0.024947	0.756	0.0206008
	8	28°42′48.86″	106°23′12.10″	23.5	9.2	224	8.86	1.51	0.95	0.01919	0.591	0.0168552
	9	28°43′50.07″	106°22′57.82″	25	9.1	263	6	1.51	1.36	0.036461	0.418	0.0224736
	10	28°44′16.80″	106°22′48.10″	25.7	9	251	7.3	1.51	0.92	0.030704	0.4325	0.0224736
	11	28°45′15.41″	106°22′48.10″	25.9	9.1	243	6.8	7.52	0.44	0.061408	0.289	0.0168552
	12	28°45′53.63″	106°21′53.10″	25.9	9.3	243	7.1	7.52	0.55	0.026866	0.3265	0.018728
	13	28°46′18.65″	106°21′30.19″	25	9	285	6.5	7.52	0.37	0.034542	0.3385	0.0224736
	45	28°46′50.45″	106°18′52.34"	25.4	8.9	178.8	8.7	4.51	0.92	0.042218	0.6175	0.0112368
	46	28°48′20.84″	106°16′41.86″	25.7	9	231	8.4	1.51	0.92	0.036461	0.576	0.0243464
	47	28°49′19.63″	106°18′41.57″	27.2	8.7	253	8.6	4.51	0.77	0.034542	0.3325	0.0131096
	48	28°45′29.15″	106°25′22.05″	28.4	9.2	254	7.4	1.51	0.5	0.040299	0.3555	0.018728
	49	28°48′51.51″	106°22′14.65″	29.3	9.1	245	7.1	2.51	0.59	0.03838	0.453	0.0243464
	50	28°51′4.24″	106°20′37.88″	30.1	9.2	254	7.3	3.51	0.61	0.092112	0.4035	0.0262192
middle reach	14	28°48′42.45″	106°19′39.73″	25.4	8.9	278	7.2	9.03	0.48	0.03838	0.381	0.0149824
	15	28°49′55.97″	106°19′12.65″	25.6	8	304	6.5	6.02	0.42	0.126654	0.4355	0.0580568
	16	28°50′22.22″	106°19′24.02″	27.1	9.2	214	6.4	9.03	0.46	0.040299	0.3785	0.018728
	17	28°51′23.33″	106°19′53.95″	28.7	9.1	216	8	9.03	0.62	0.05757	0.3855	0.0074912
	18	28°52′47.12″	106°20′5.02″	31.7	9	217	10	7.52	0.55	0.099788	0.352	0.0224736
	19	28°53′15.94″	106°20′48.14″	30.2	8.8	238	9.2	9.03	0.61	0.051813	0.461	0.0243464
	20	28°53′58.93″	106°20′43.77″	28.9	9	241	8.7	7.52	0.51	0.042218	0.4645	0.018728
	21	28°54′38.35″	106°22′3.10″	28.5	9.1	238	7.9	7.52	0.62	0.044137	0.483	0.0299648
	22	28°55′47.31″	106°22′4.08″	28.4	9	243	9.6	10.53	0.64	0.042218	0.3665	0.018728
	23	28°56′36.60″	106°22′4.86″	27.8	9.1	233	8.8	6.02	0.73	0.036461	0.4075	0.0206008
	24	28°58′28.35″	106°20′47.94″	29	8.4	242	5.7	1.51	0.72	0.03838	0.509	0.028092
	25	28°59′22.94″	106°20′53.34″	25.4	8.5	299	8.6	6.02	0.72	0.040299	0.65	0.0206008
	26	29°0′22.70″	106°19′34.23″	27	9.4	222	7.9	6.02	1.12	0.034542	0.5355	0.018728
	27	29°1′19.45″	106°19′10.31″	26.1	9	218	8.8	9.03	0.97	0.030704	0.731	0.0206008
	28	29°2′35.14″	106°18′40.66″	26.4	8.5	221	6.9	1.51	1.05	0.101707	0.7195	0.018728
	29	29°4′24.55″	106°19′44.24″	27	8.8	238	5.7	3.01	1.05	0.034542	0.717	0.028092
	30	29°5′20.21″	106°19′12.18″	27.7	8.5	238	7.2	1.51	0.83	0.049894	0.7455	0.028092
	31	29°6′40.94″	106°18′27.00″	28	8.7	248	7.8	6.02	0.88	0.032623	0.588	0.0224736
	51	28°55′37.86″	106°18′37.87″	24.4	8.7	325	8.2	4.51	1.36	0.126654	1.219	0.0692936
	52	28°57′51.12″	106°17′30.06″	23.7	9	497	7.8	5.51	2.6	0.17271	0.889	0.155442
	53	28°59′27.86″	106°15′48.09″	25.3	8.5	254	7	6.51	0.83	0.028785	0.611	0.0224736
lower reach	32	29°7′24.03″	106°18′5.86″	27.6	8.8	233	8.2	7.52	0.5	0.05757	0.5735	0.0112368
	33	29°8′0.95″	106°17′56.66″	28.3	8.7	236	9.1	9.03	1.19	0.034542	0.8265	0.0262192
	34	29°8′54.56″	106°17′46.44″	29	8.9	233	7.2	4.51	1.16	0.088274	0.752	0.028092
	35	29°9′13.63″	106°16′45.51″	29.6	8.6	236	6.8	4.51	1.08	0.040299	0.8105	0.0206008
	36	29°10′6.34″	106°16′48.93″	31.5	9.1	224	8.9	1.51	0.94	0.028785	0.7345	0.0112368
	37	29°9′47.61″	106°18′7.77″	30.9	8.5	228	8.6	3.01	1.12	0.03838	0.7275	0.018728
	38	29°9′47.53″	106°19′42.92″	28.2	8.8	264	6.9	6.01	1.1	0.044137	0.7665	0.0412016
	39	29°10′59.87″	106°20′20.05″	31	8.6	261	8.9	9.03	1.36	0.067165	0.877	0.0449472
	40	29°11′58.88″	106°20′50.47″	29.2	8.2	646	7.8	7.52	1.05	0.046056	0.685	0.0318376
	41	29°12′49.80″	106°21′30.45″	31	8	272	8.2	3.01	1.34	0.07676	0.9085	0.037456
	42	29°13′53.08″	106°21′59.38″	31.1	9.2	269	9.7	3.01	1.21	0.051813	0.8165	0.0430744
	43	28°47′32.31″	106°20′22.24″	28.8	9.3	272	9.4	1.51	1.1	0.176548	0.851	0.0430744
	44	29°3′16.37″	106°19′49.30″	29.6	9.1	400	9.8	1.51	1.23	0.024947	0.994	0.0168552
		T: water temperature; DO: dissolved oxygen; EC: electrical conductivity；COD: chemical oxygen demand；TN: total nitrogen; NN: nitrate nitrogen; TP: total phosphorus; DP: dissolved phosphorus.

## Sheet: TN
				1	2	3	5	7	9	13	17	(d)
T	pH	D(r/min)	number	TN(mg/L)	TN(mg/L)	TN(mg/L)	TN(mg/L)	TN(mg/L)	TN(mg/L)	TN(mg/L)	TN(mg/L)
5	5	0	1-1	0.5994	0.192899	0.295199	0.150603	0.0400185	0.308483	0.153806	0.333589
			1-2	0.746295	0.195733	0.3	0.141522	0.08	0.267688	0.0937624	0.307532
			1-3	0.54	0.144588	0.308103	0.128034	0.0521811	0.214498	0.101602	0.325716
5	7	100	2-1	0.17	0.213638	0.123641	0.0773916	0.0988154	0.312166	0.0725656	0.49821
			2-2	0.293054	0.155873	0.129087	0.0945017	0.13	0.220973	0.12935	0.52
			2-3	0.252843	0.223296	0.126113	0.0714403	0.0942339	0.167486	0.147231	0.541745
5	9	200	3-1	0.0996356	0.2	0.211654	0.0670842	0.0879175	0.412046	0.177434	0.23751
			3-2	0.157434	0.293204	0.274404	0.114146	0.137484	0.401031	0.235586	0.285565
			3-3	0.210751	0.260542	0.202037	0.0481407	0.0591374	0.371836	0.279669	0.239871
25	5	200	4-1	0.18	0.516649	0.487695	0.292913	0.378067	0.4	0.672004	0.420396
			4-2	0.210828	0.430426	0.730938	0.412863	0.227248	0.748344	0.811305	0.598191
			4-3	0.2658	0.651595	0.672959	0.451505	0.53	0.693486	0.615646	0.833448
25	7	0	5-1	0.335527	0.29977	0.407418	0.303376	0.499985	0.784424	0.76804	0.74504
			5-2	0.343091	0.322064	0.148244	0.471145	0.569774	0.599146	0.87506	0.731916
			5-3	0.292485	0.414884	0.148616	0.322556	0.667255	0.615585	0.852635	0.746472
25	9	100	6-1	0.207707	0.272298	0.44	0.431325	0.771701	0.710092	0.60661	0.5694
			6-2	0.199038	0.38	0.521889	0.317924	0.313675	0.742215	0.694141	0.661322
			6-3	0.328484	0.33394	0.50508	0.501077	0.56	0.771581	0.64	0.705593
35	5	100	7-1	0.370391	0.582509	0.688694	0.54	0.789373	0.790683	0.965733	0.83
			7-2	0.394942	0.655155	0.441959	0.46	0.760858	0.752741	1.00292	0.971578
			7-3	0.44	0.875603	0.683756	0.58896	0.861393	0.643724	1.15854	0.967474
35	7	200	8-1	0.398613	0.771482	0.515658	0.891355	0.777357	0.720786	0.975639	0.730648
			8-2	0.471757	0.56075	0.687567	0.7544	0.925437	0.694576	0.948019	0.796413
			8-3	0.514826	0.798722	0.592346	0.882955	0.57595	0.87029	1.15389	0.924818
35	9	0	9-1	0.37	0.787876	0.415261	0.916161	0.77401	0.691339	1.05925	0.789221
			9-2	0.322882	0.445485	0.426548	0.7415	0.787327	0.726156	0.854403	0.792351
			9-3	0.264023	0.576496	0.76	0.742522	0.763396	0.747834	0.987926	1.04932

## Sheet: AN
				1	2	3	5	7	9	13	17	(d)
T	pH	D(r/min)	number	NH4+-N(mg/L)	NH4+-N(mg/L)	NH4+-N(mg/L)	NH4+-N(mg/L)	NH4+-N(mg/L)	NH4+-N(mg/L)	NH4+-N(mg/L)	NH4+-N(mg/L)
5	5	0	1-1	0.540252	0.129346	0.0911188	0.0474945	0.06	0.239442	0.0672912	0.238879
			1-2	0.637031	0.124894	0.106987	0.0942574	0.09	0.192212	0.0367354	0.235877
			1-3	0.49	0.16	0.101103	0.0432236	0.05	0.145019	0.0147596	0.261264
5	7	100	2-1	0.15	0.147357	0.0531624	0.11	0.0243038	0.138536	0.0156784	0.439717
			2-2	0.213605	0.101874	0.0569233	0.1	0.0123965	0.160701	0.0547906	0.4
			2-3	0.185949	0.137801	0.0865556	0.11	0.0508114	0.110283	0.0969454	0.473426
5	9	200	3-1	0.0605159	0.100048	0.147744	0.17	0.0616398	0.31044	0.107905	0.171831
			3-2	0.109003	0.224448	0.225571	0.18	0.0956508	0.339541	0.165839	0.2026
			3-3	0.121272	0.162326	0.117124	0.18	0.0314059	0.308236	0.223513	0.17417
25	5	200	4-1	0.0714649	0.410891	0.432105	0.231752	0.229879	0.58	0.590401	0.39
			4-2	0.0279021	0.36488	0.679337	0.36488	0.181587	0.69226	0.738892	0.470281
			4-3	0.0663843	0.574125	0.513702	0.388993	0.21	0.628991	0.539736	0.670945
25	7	0	5-1	0.195338	0.181876	0.14	0.261264	0.445972	0.711809	0.672786	0.624125
			5-2	0.225946	0.250717	0.125124	0.25	0.533762	0.538939	0.76633	0.519454
			5-3	0.173244	0.34874	0.123473	0.263338	0.633049	0.551306	0.772795	0.489577
25	9	100	6-1	0.150476	0.222016	0.323673	0.374125	0.73	0.652165	0.528591	0.38
			6-2	0.103602	0.26	0.45968	0.285831	0.29	0.694109	0.613196	0.485239
			6-3	0.177321	0.250906	0.456935	0.422168	0.484647	0.710572	0.26	0.623518
35	5	100	7-1	0.292087	0.494906	0.596644	0.694725	0.733091	0.689796	0.257118	0.0264625
			7-2	0.321192	0.576332	0.58	0.55	0.689796	0.646056	0.04	0.033678
			7-3	0.35	0.8	0.650535	0.529784	0.805037	0.554303	0.75	0.0506306
35	7	200	8-1	0.311472	0.567709	0.470085	0.739307	0.67688	0.61077	0.37	0.0457292
			8-2	0.428011	0.455368	0.644428	0.710572	0.85	0.551706	0.122189	0.0472548
			8-3	0.456348	0.692876	0.528591	0.827984	0.519454	0.738063	0.151501	0.0783683
35	9	0	9-1	0.21	0.56	0.370078	0.834318	0.712634	0.585573	0.781359	0.414
			9-2	0.264652	0.67	0.360071	0.682206	0.728538	0.635079	0.745322	0.16
			9-3	0.209126	0.514297	0.36	0.702951	0.712428	0.659097	0.865257	0.169355

## Sheet: NN
				1	2	3	5	7	9	13	17	(d)
T	pH	D(r/min)	number	NO3--N(mg/L)	NO3--N(mg/L)	NO3--N(mg/L)	NO3--N(mg/L)	NO3--N(mg/L)	NO3--N(mg/L)	NO3--N(mg/L)	NO3--N(mg/L)
5	5	0	1-1	0.0443423	0.0419884	0.18	0.0838511	0.0252364	0.0450461	0.0560862	0.0365874
			1-2	0.0799515	0.0465424	0.068954	0.07	0.03	0.0537101	0.0339352	0.0385317
			1-3	0.0680587	0.0495332	0.0406572	0.0650959	0.0441903	0.044535	0.0256737	0.0286485
5	7	100	2-1	0.0861959	0.0567128	0.0587123	0.0412506	0.0484407	0.05	0.036918	0.0267836
			2-2	0.0703794	0.0401472	0.0563512	0.0646307	0.0230572	0.0375158	0.0502736	0.0341109
			2-3	0.0595399	0.056364	0.0316986	0.0440522	0.0386336	0.0345965	0.0317568	0.032592
5	9	200	3-1	0.0359147	0.0529432	0.0545713	0.0402487	0.0228775	0.03	0.0370296	0.0351653
			3-2	0.0439756	0.0445178	0.0366109	0.0512032	0.0307689	0.0312968	0.0378087	0.0392736
			3-3	0.0748294	0.0686413	0.0627239	0.0321557	0.0220669	0.035364	0.0281105	0.0307719
25	5	200	4-1	0.17	0.042867	0.0348438	0.0302097	0.04	0.0298248	0.0193442	0.0301992
			4-2	0.176408	0.0368124	0.0272588	0.0225626	0.0189608	0.0206453	0.021019	0.0210153
			4-3	0.19285	0.0412166	0.04	0.0266215	0.0139719	0.0219756	0.0201593	0.0620435
25	7	0	5-1	0.10579	0.0820284	0.0216957	0.0317757	0.0273503	0.0231651	0.028713	0.0210539
			5-2	0.0885441	0.0588831	0.0191084	0.0158305	0.0134739	0.0179141	0.0283591	0.0362728
			5-3	0.0708683	0.0496466	0.0196334	0.0299269	0.0114315	0.0245856	0.0195019	0.0500843
25	9	100	6-1	0.0496018	0.0377578	0.0337871	0.0253545	0.01467	0.0217874	0.0180294	0.018003
			6-2	0.0744535	0.06	0.040358	0.0233278	0.0075267	0.0174201	0.0224209	0.018271
			6-3	0.06	0.0477696	0.0258016	0.0400944	0.02	0.0192391	0.0216127	0.0166392
35	5	100	7-1	0.0611251	0.0458438	0.02	0.036398	0.00881334	0.0199754	0.0406584	0.172286
			7-2	0.0621335	0.0557428	0.0198088	0.0154934	0.0123936	0.0210552	0.0551314	0.271357
			7-3	0.0558905	0.0459812	0.0130161	0.0171767	0.0081018	0.0157744	0.0322659	0.250265
35	7	200	8-1	0.0650024	0.135372	0.020731	0.03	0.0123181	0.0193374	0.062553	0.39
			8-2	0.0297114	0.0770489	0.0200154	0.0123879	0.00838216	0.0302781	0.0498244	0.33
			8-3	0.0429126	0.0526577	0.0352786	0.013218	0.0158954	0.0183992	0.0656945	0.34
35	9	0	9-1	0.0485738	0.0346769	0.0261699	0.0296693	0.008567	0.0213075	0.0446703	0.31
			9-2	0.0455133	0.0418798	0.0322079	0.0152873	0.0103393	0.0248225	0.032371	0.394744
			9-3	0.0460205	0.0387849	0.0311479	0.0126684	0.00655417	0.0165112	0.0313161	0.400954
